# Supplementary material
Source: PubMed Central journal article supplement (PMC5667900)

Source data for Extended Data Fig. 1

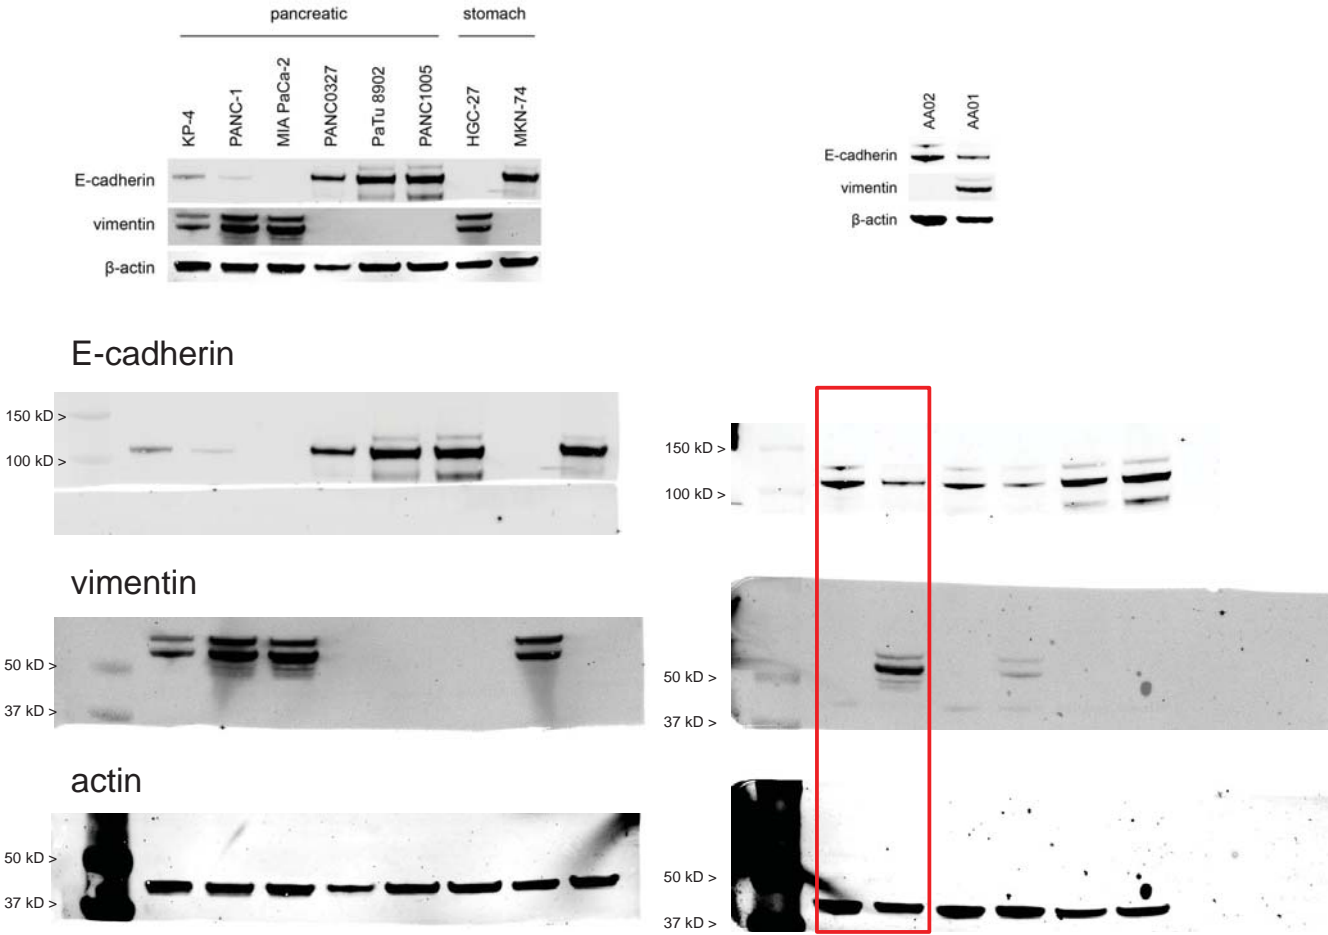

Source data for Figure 2c

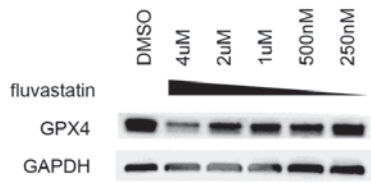

GPX4

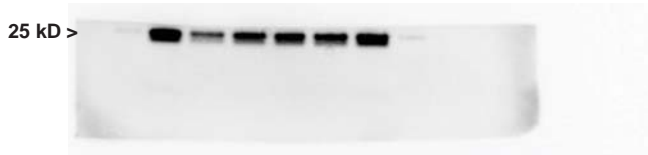

GAPDH

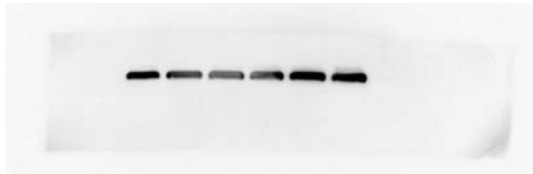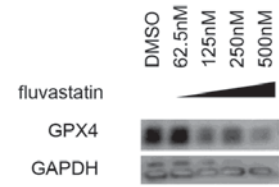

GPX4

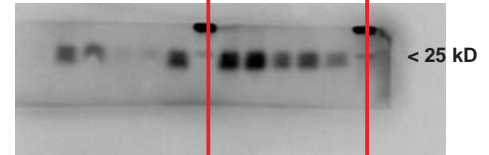

GAPDH

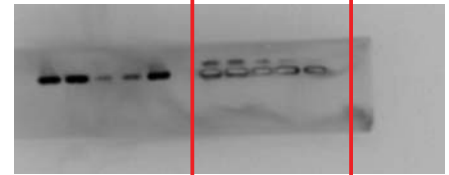

Source data for Extended Data Fig. 7a

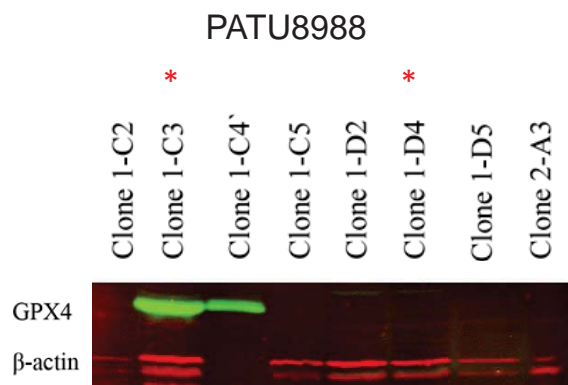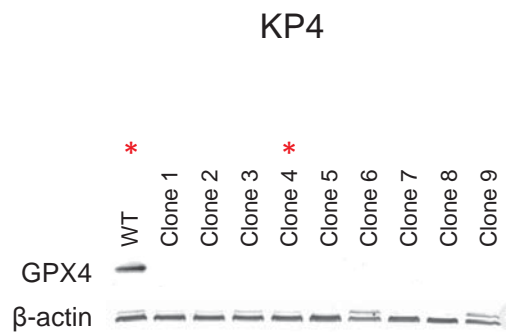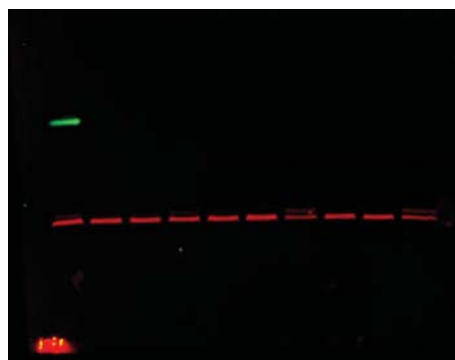

Source data for Extended Data Fig. 7a

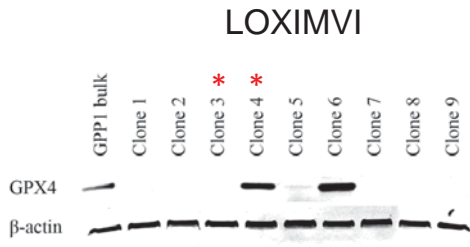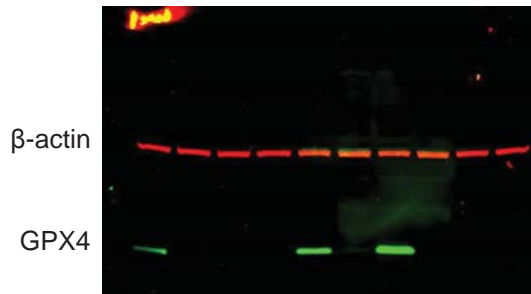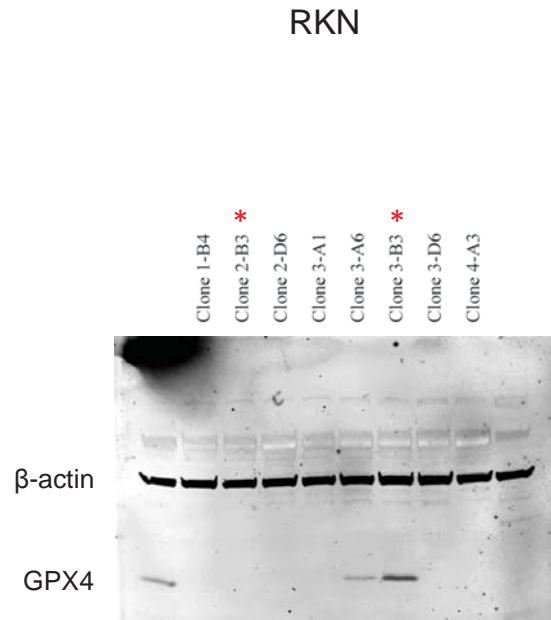

Source data for Extended Data Fig. 7b

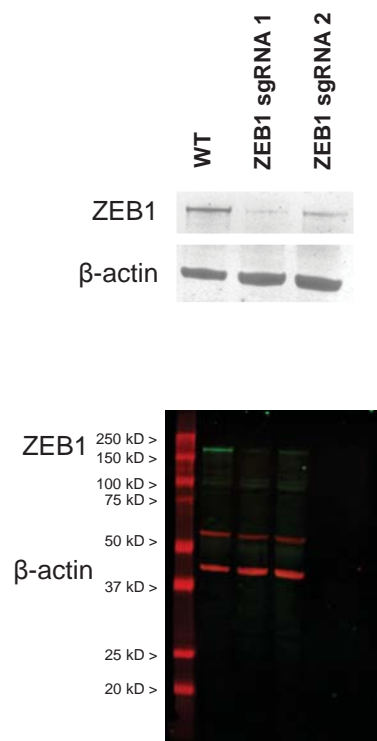

Source data for Extended Data Fig. 1

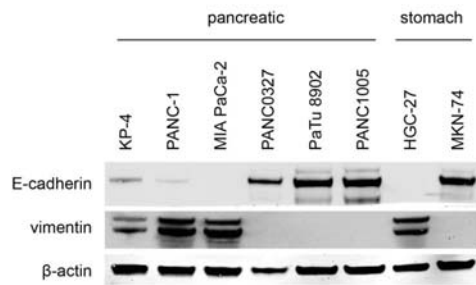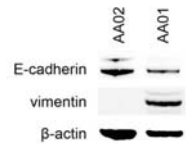

E-cadherin

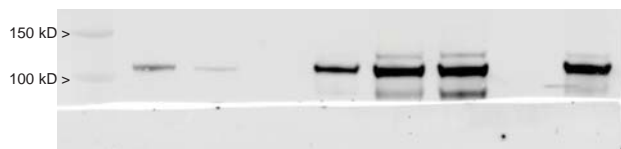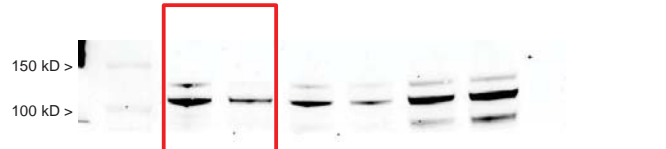

vimentin

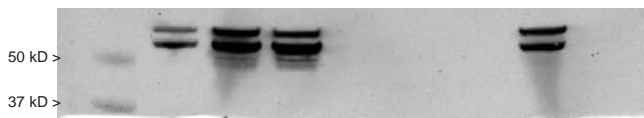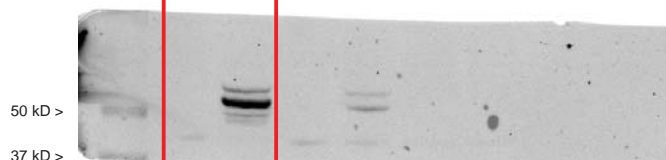

actin

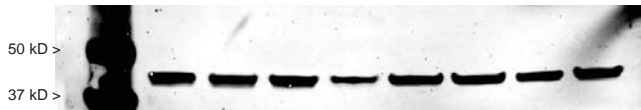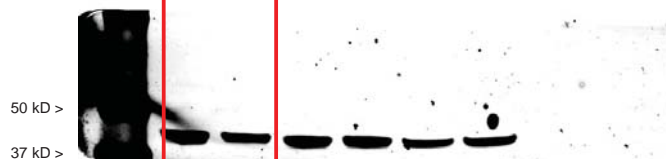

Supplement: NIHMS910346-supplement-supp_1.pdf [file NIHMS910346-supplement-supp_1.pdf]
